# Supplementary material for: Anti-Aging Constituents from Pinus morrisonicola Leaves
Source: MDPI journal article supplement (doi:10.3390/molecules28135063), 2023-06-28
Supplement: s1 [file s1]

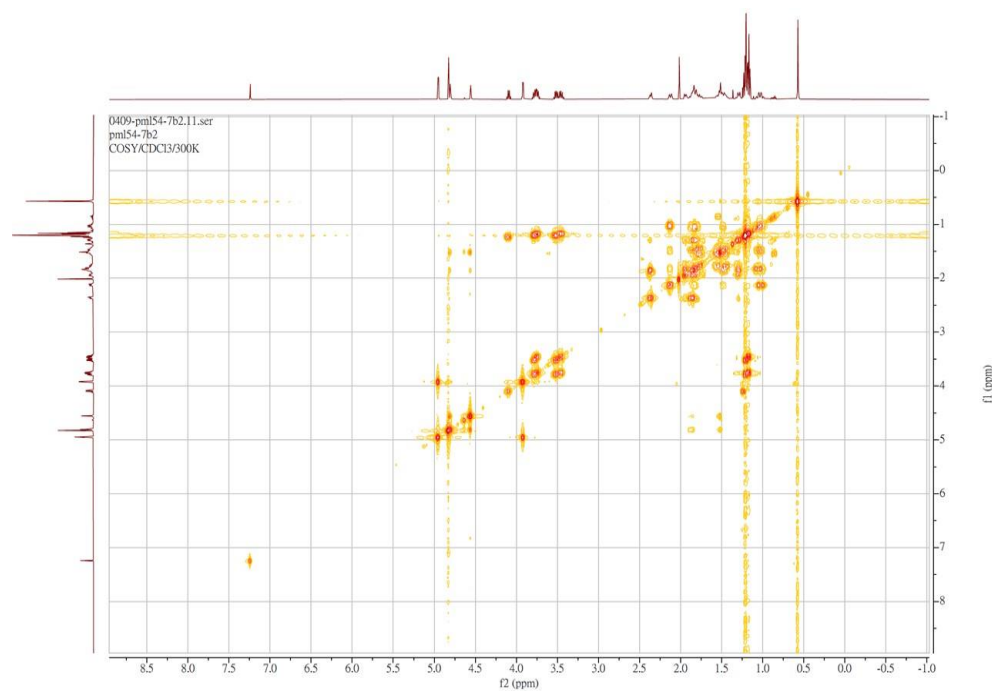

**Figure S3.** PML18  $^1\text{H}$ - $^1\text{H}$  COSY NMR spectrum.

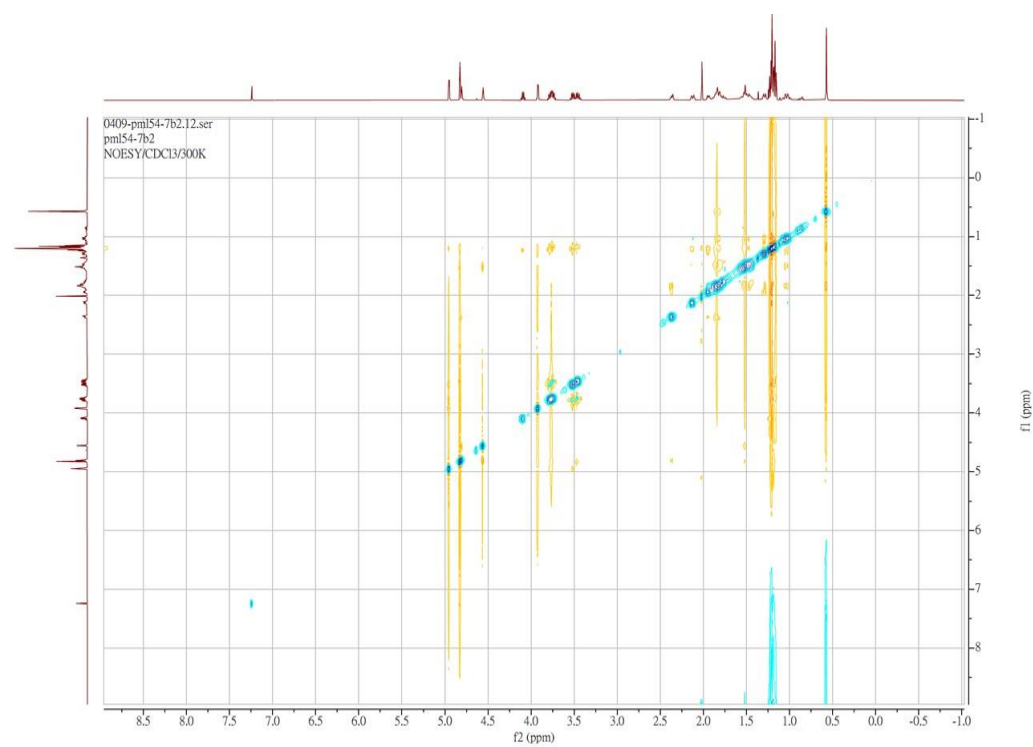

**Figure S4.** PML18  $^1\text{H}$ - $^1\text{H}$  NOESY NMR spectrum.

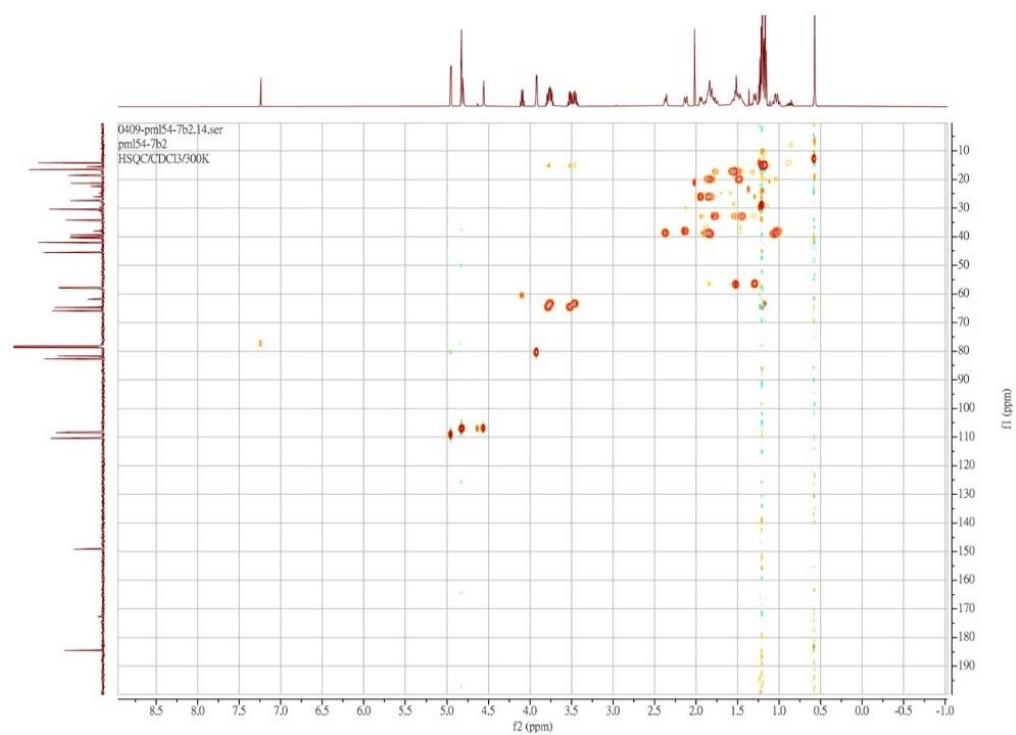

**Figure S5.** PML18  $^1\text{H}$ - $^{13}\text{C}$  HSQC NMR spectrum.

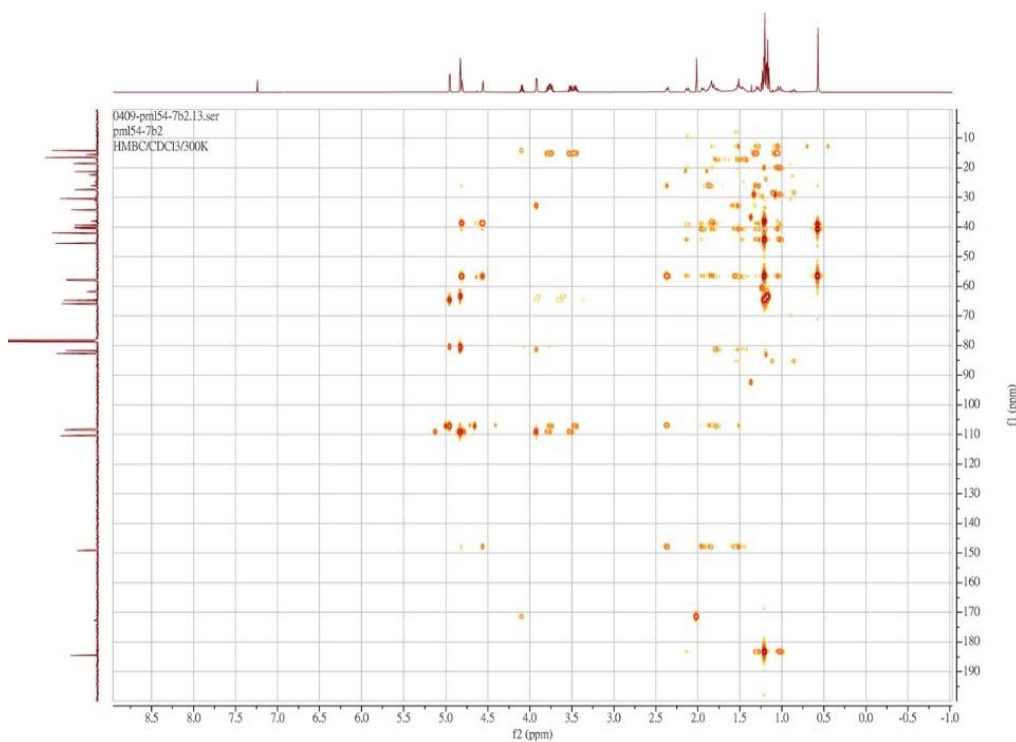

**Figure S6.** PML18  $^1\text{H}$ - $^{13}\text{C}$  HMBC NMR spectrum.



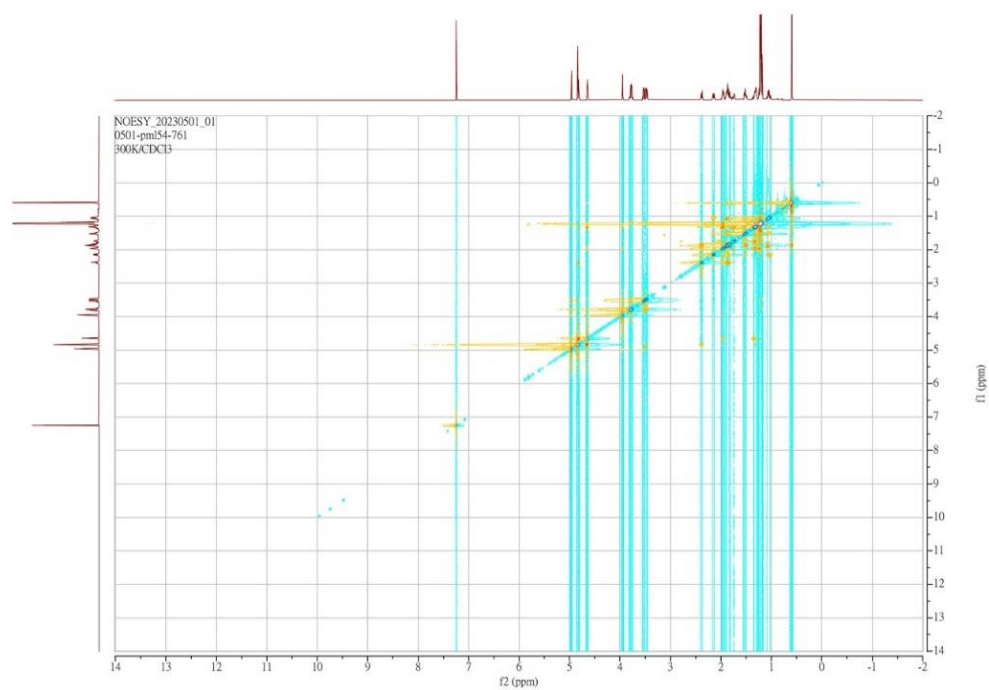

**Figure S9.** PML19  $^1\text{H}$ - $^1\text{H}$  NOESY NMR spectrum.

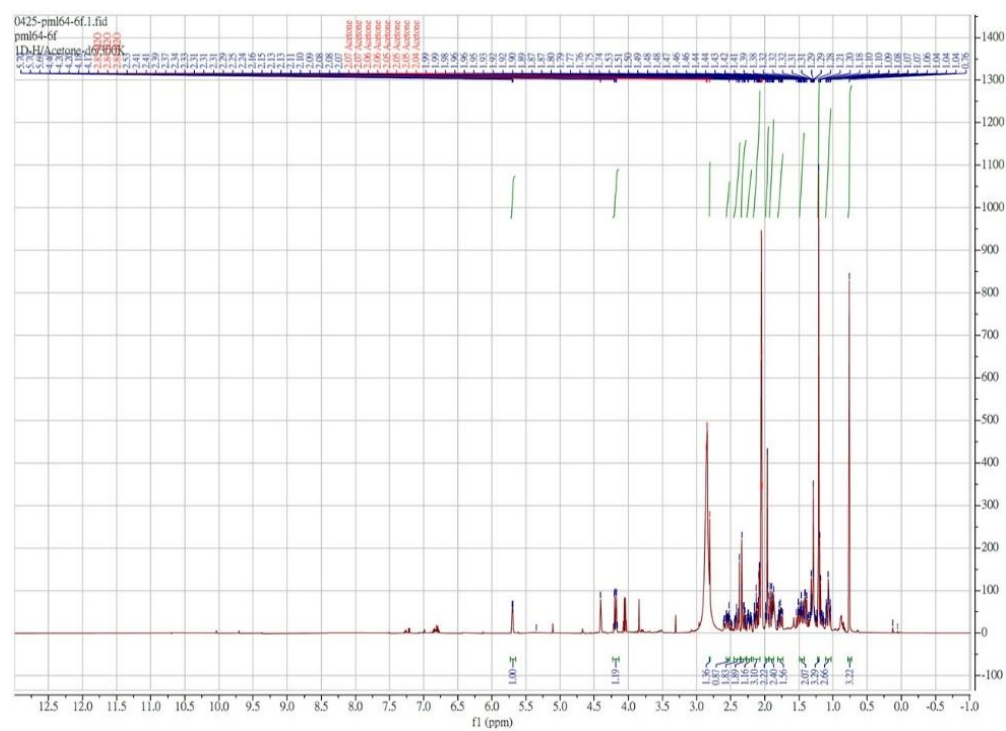

**Figure S10.** PML20  $^1\text{H}$ -NMR spectrum.

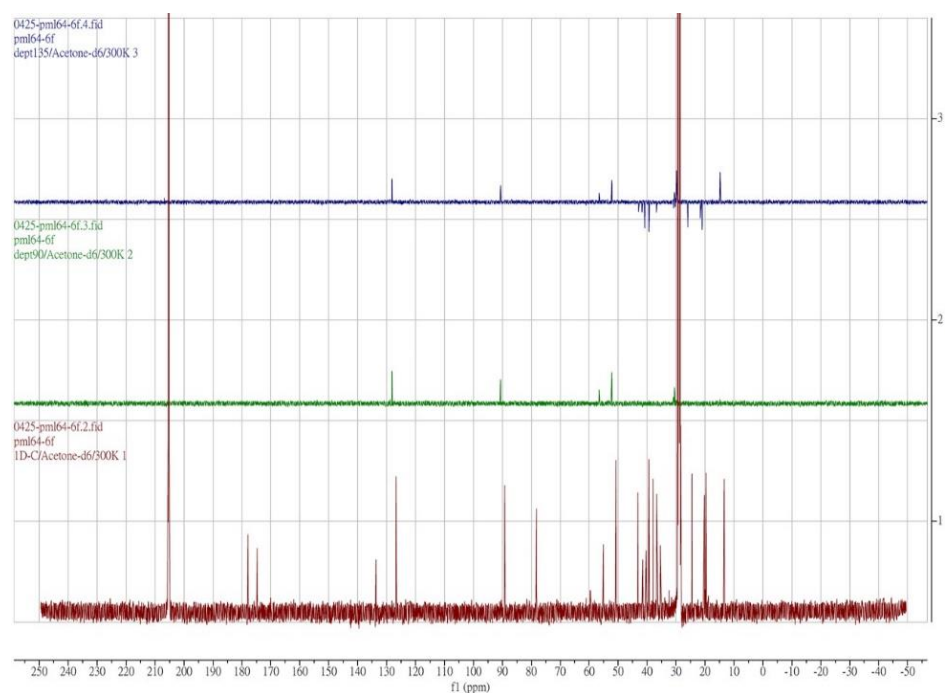

**Figure S11.** PML20 DEPT-NMR spectrum.

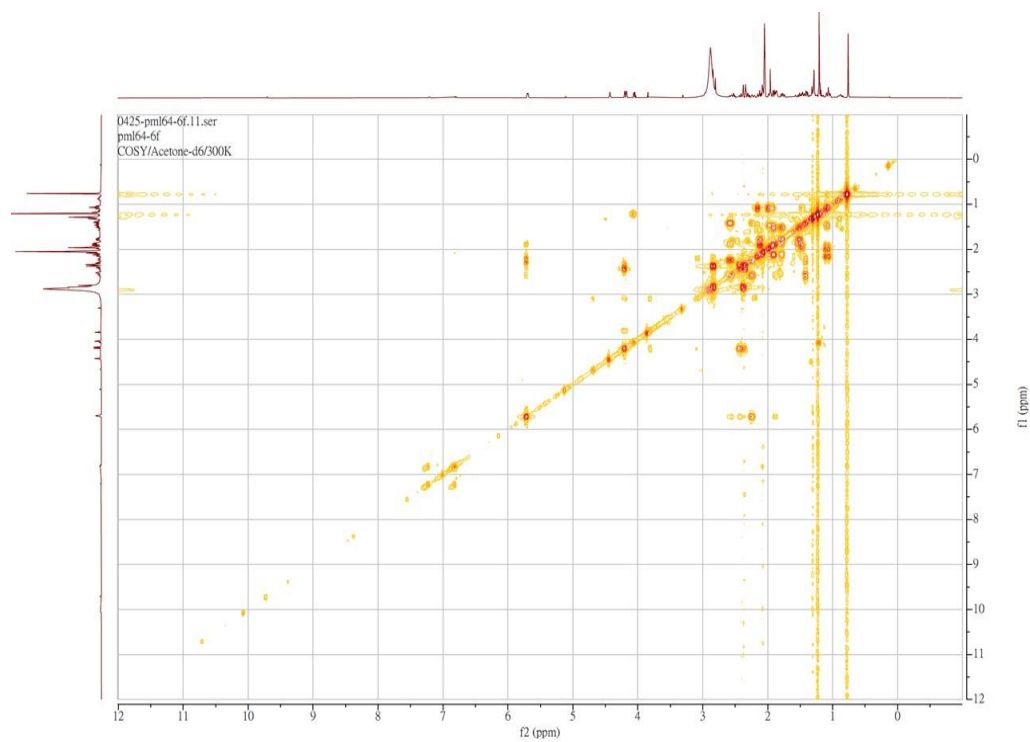

**Figure S12.** PML20  $^1\text{H}$ - $^1\text{H}$  COSY NMR spectrum.

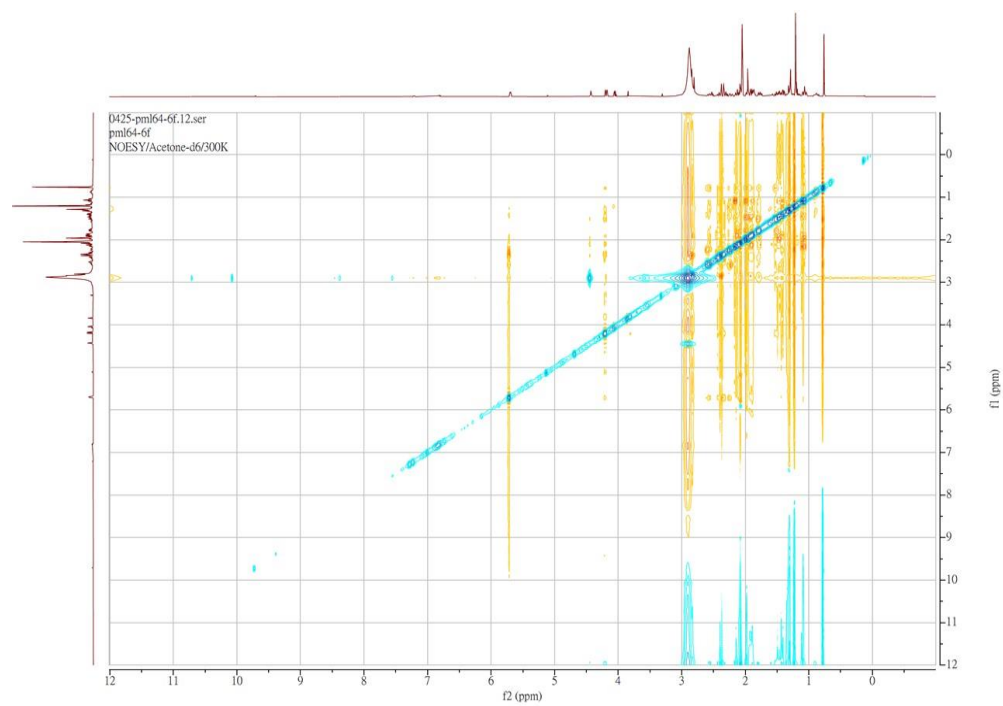

**Figure S13.** PML20  $^1\text{H}$ - $^1\text{H}$  NOESY NMR spectrum.

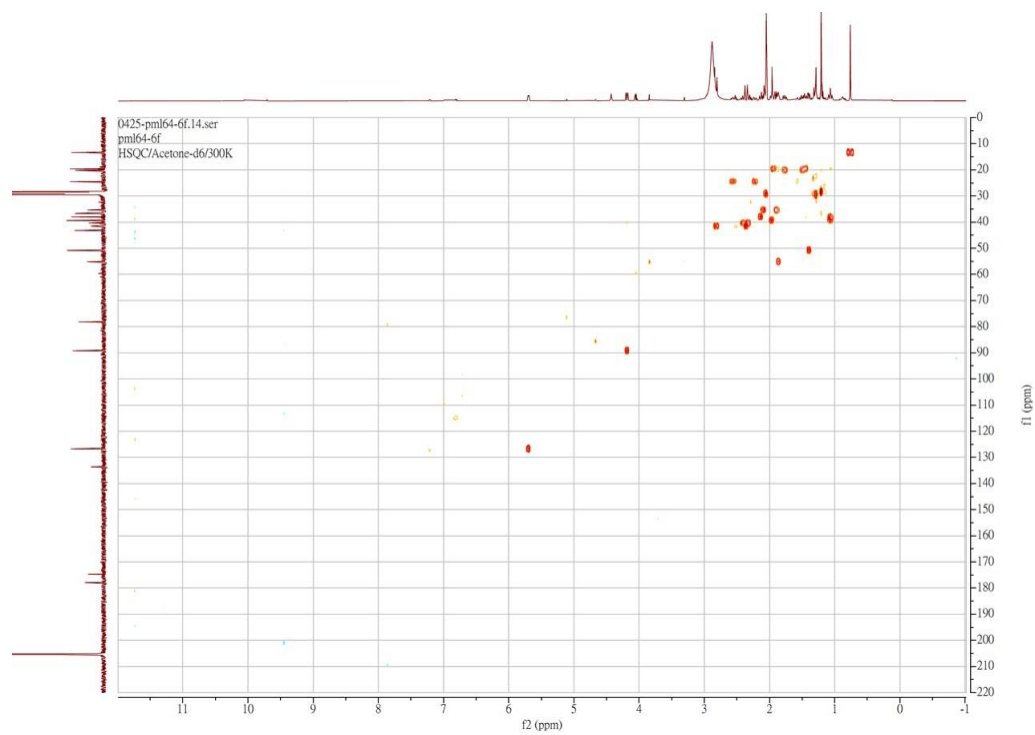

**Figure S14.** PML20  $^1\text{H}$ - $^{13}\text{C}$  HSQC NMR spectrum.

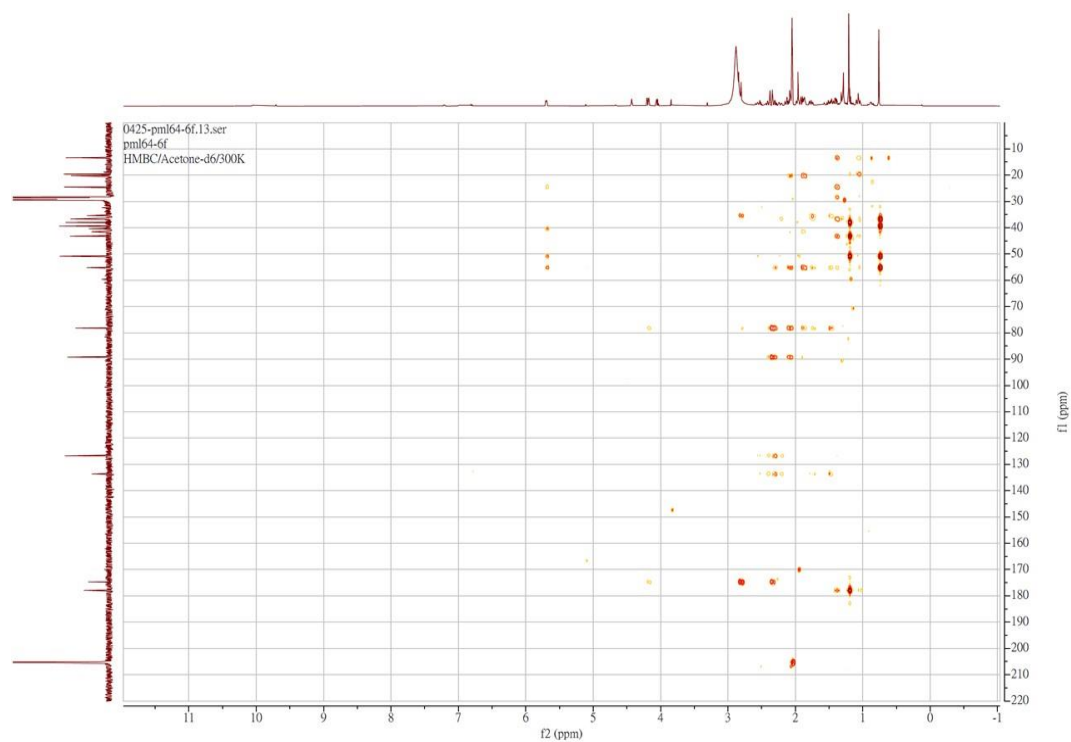

Figure S15. PML20  $^1\text{H}$ - $^{13}\text{C}$  HMBC NMR spectrum.

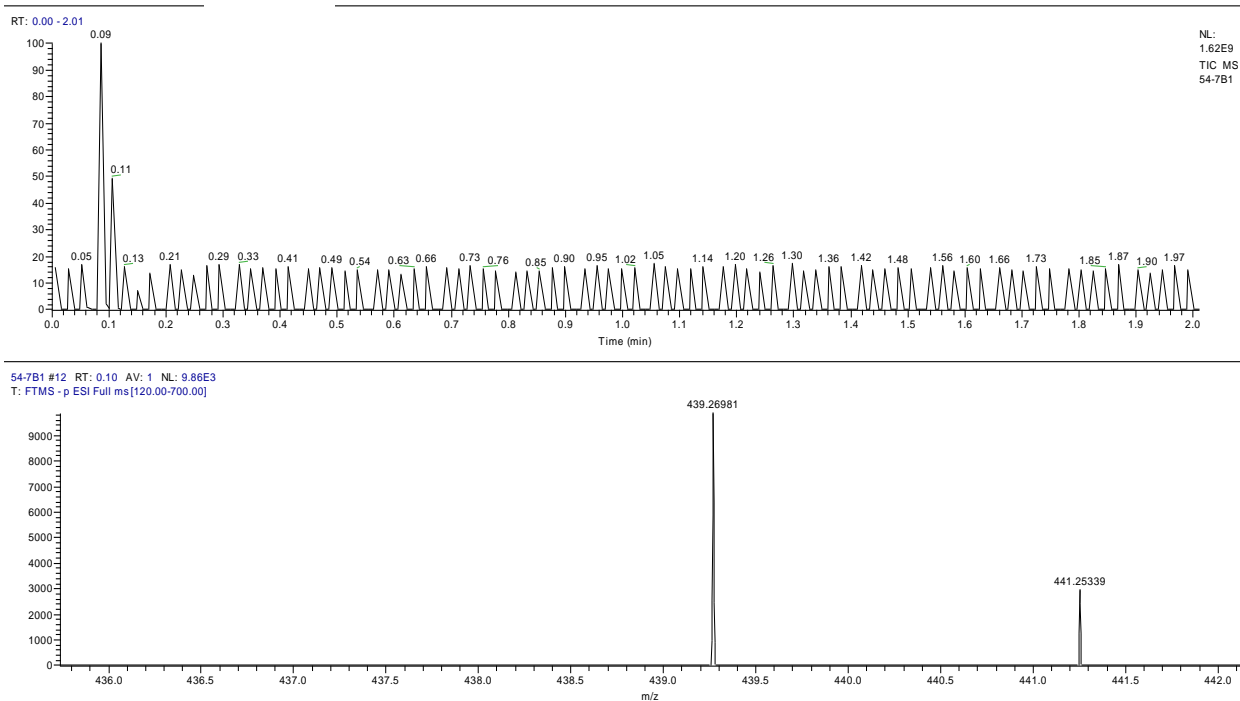

Figure S16. PML18 LC-MS spectrum.

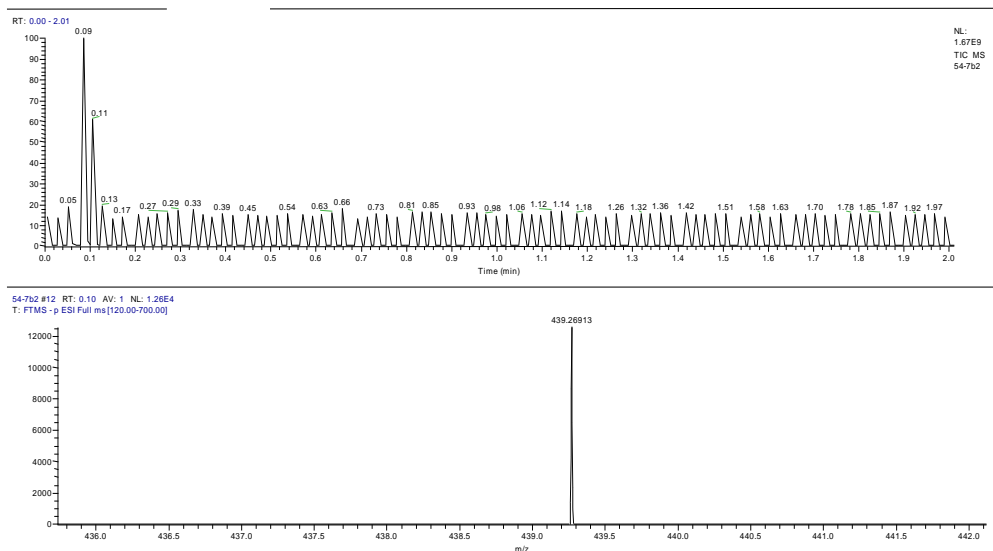

**Figure S17.** PML19 LC-MS spectrum.

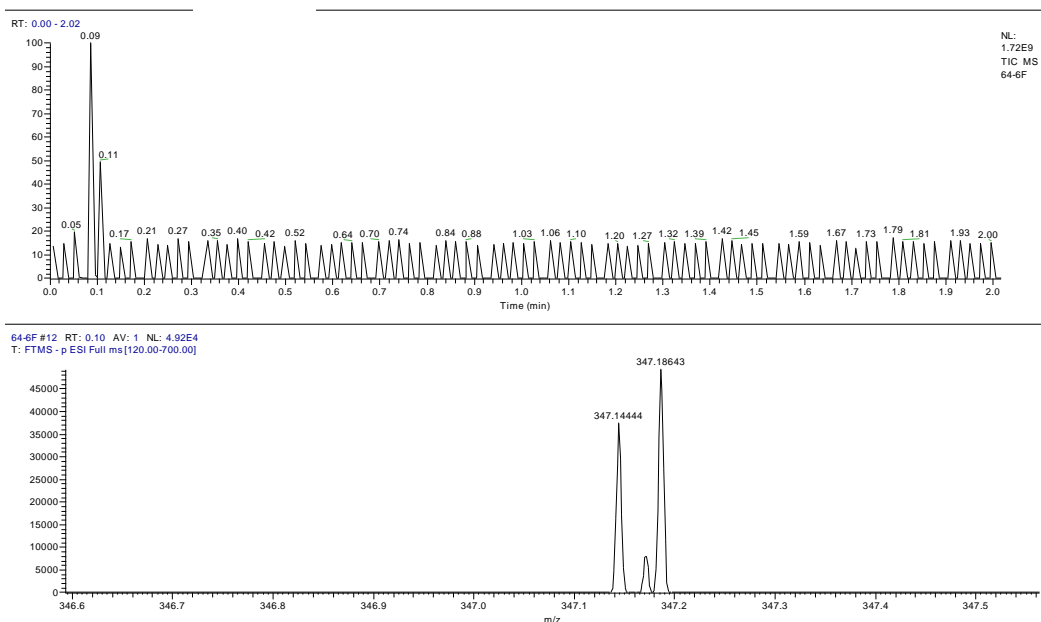

**Figure S18.** PML20 LC-MS spectrum.

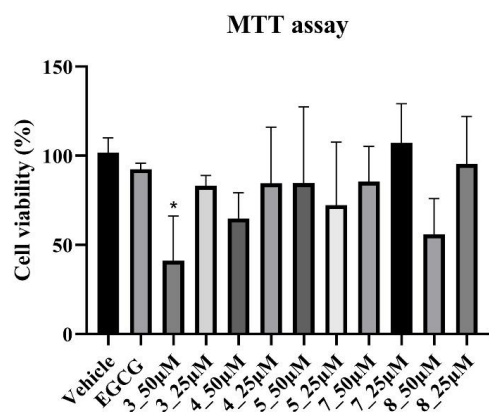

**Figure S19.** Cytotoxicity of compounds **3**, **4**, **5**, **7** and **8** to HT-1080 cells. Results of cytotoxicity of each sample were expressed as % of control cells and mean  $\pm$  SD (n = 3). p-values were derived from one-way ANOVA with Dunnett's multiple comparison tests. \*  $p$ -value < 0.05.

**Table S1.** Table of PML18 and PML20 HMBC spectrum.

|          | PML18                                       |                                    | PML20                                                    |                                           |
|----------|---------------------------------------------|------------------------------------|----------------------------------------------------------|-------------------------------------------|
|          | <sup>1</sup> H-NMR                          | HMBC                               | <sup>1</sup> H-NMR                                       | HMBC                                      |
| Position | δ <sub>H</sub> (Multiplet , <i>J</i> in Hz) | δ <sub>C</sub>                     | δ <sub>H</sub> (Multiplet , <i>J</i> in Hz)              | δ <sub>C</sub>                            |
| 1        | 1.07(m), 1.81(m)                            | 40.8, 56.6                         | 1.04(m), 1.08(m)                                         | 14.4, 20.6, 37.7, 42.4, 51.8              |
| 2        | 1.52(m), 1.78(m)                            | 13.0, 40.8, 56.6,                  | 1.45(m), 1.92(m)                                         | 37.7, 51.8, 178.9                         |
| 3        | 1.01(m), 2.12(m)                            | 20.1, 29.2, 44.4, 56.6,183.3       | 1.94(m), 1.97(m)                                         | 20.6, 51.8                                |
| 4        | ---                                         | ---                                | ---                                                      | ---                                       |
| 5        | 1.28(m)                                     | 13.0, 26.1, 40.8, 44.4, 183.3      | 1.39(d, <i>J</i> = 4.3 Hz)                               | 14.4, 25.5, 29.5, 37.7, 44.2, 56.2, 178.9 |
| 6        | 1.83(m), 1.96(m)                            | 38.9,40.8, 56.6, 147.9             | 2.20(m), 2.52(m)                                         | 37.7, 127.8, 134.6                        |
| 7        | 1.84(m), 2.36(m)                            | 26.1, 56.6, 107.6, 147.9           | 5.68(d, <i>J</i> = 6.3 Hz)                               | 25.5, 41.4, 51.8, 56.2                    |
| 8        | ---                                         | ---                                | ---                                                      | ---                                       |
| 9        | 1.51(m)                                     | 13.0, 33.0,40.8, 56.6, 81.5, 147.9 | 1.87(m)                                                  | 21.2, 41.4, 79.2, 90.2                    |
| 10       | ---                                         | ---                                | ---                                                      | ---                                       |
| 11       | 1.47(m), 1.83(m)                            | 38.9, 40.8, 56.8,107.6, 147.9      | 1.45(m), 1.75(m)                                         | 14.4, 36.4, 56.2, 79.2,                   |
| 12       | 1.44(m), 1.75(m)                            | 56.8, 81.5, 107.3                  | 1.87(m), 2.07(m)                                         | 21.2, 41.4, 56.2, 79.2, 90.2,             |
| 13       | ---                                         | ---                                | ---                                                      | ---                                       |
| 14       | 3.91(d, <i>J</i> = 4 Hz)                    | 33.0, 81.5, 109.2                  | 2.35(d, <i>J</i> = 10.7 Hz), 2.81(d, <i>J</i> = 10.7 Hz) | 36.4, 79.2, 90.2, 175.7                   |
| 15       | 4.96(d, <i>J</i> = 4 Hz)                    | 62.7, 80.5, 107.3                  | ---                                                      | ---                                       |
| 16       | 4.82(s)                                     | 63.3, 81.5, 109.2                  | 4.18(dd, <i>J</i> = 12.2 , 2.8 Hz)                       | 79.2, 175.7                               |
| 17       | 3.51(m), 3.77(m)                            | 15.4, 109.2                        | 2.30(m), 2.40(m)                                         | 56.2, 79.2, 90.2, 127.8, 134.6, 175.7     |
| 18       | 1.18(s)                                     | 62.7                               | ---                                                      | ---                                       |
| 19       | 3.45(m), 3.74(m)                            | 15.4, 107.3                        | 1.20(s)                                                  | 42.4, 51.8, 178.9                         |
| 20       | 1.18(s)                                     | 63.3                               | 0.75(s)                                                  | 37.7, 39.0, 51.8, 56.2                    |
| 21       | 4.55(bris), 4.80(bris)                      | 38.9, 56.8, 147.9                  | ---                                                      | ---                                       |
| 22       | ---                                         | ---                                | ---                                                      | ---                                       |
| 23       | 1.20(s)                                     | 38.2, 44.4, 56.6, 183.3            | ---                                                      | ---                                       |
| 24       | 0.57(s)                                     | 39.2, 40.8, 56.6, 56.8             | ---                                                      | ---                                       |
